# Supplementary material
Source: PubMed Central journal article supplement (PMC3645473)
Supplement: NIHMS453632-supplement-References.pdf [file NIHMS453632-supplement-References.pdf]

## The Cul4-Ddb1<sup>Cdt2</sup> Ubiquitin Ligase Inhibits Invasion of a Boundary-Associated Antisilencing Factor into Heterochromatin

- [Sigurd Braun](#)<sup>1</sup>,
  - [Jennifer F. Garcia](#)<sup>1</sup>,
  - [Margot Rowley](#)<sup>1</sup>,
  - [Mathieu Rougemaille](#)<sup>1,2</sup>,
  - [Smita Shankar](#)<sup>1</sup>,
  - [Hiten D. Madhani](#)<sup>1</sup>, , 
- <sup>1</sup> Department of Biochemistry and Biophysics, University of California, San Francisco, 600 16<sup>th</sup> Street, GH-N372C, San Francisco, CA 94158, USA

### Supplemental References

1.
  - [Allshire et al., 1995](#)
  - Allshire, R.C., Nimmo, E.R., Ekwall, K., Javerzat, J.P., and Cranston, G. (1995). Mutations derepressing silent centromeric domains in fission yeast disrupt chromosome segregation. *Genes Dev.* **9**, 218–233.
  -
2.
  - Trewick et al., 2007
  - Trewick, S.C., Minc, E., Antonelli, R., Urano, T., and Allshire, R.C. (2007). The JmjC domain protein Epe1 prevents unregulated assembly and disassembly of heterochromatin. *EMBO J.* **26**, 4670–4682.
  -
3.
  - [Xhemalce et al., 2004](#)
  - Xhemalce, B., Seeler, J.-S., Thon, G., Dejean, A., and Arcangioli, B. (2004). Role of the fission yeast SUMO E3 ligase Pli1p in centromere and telomere maintenance. *EMBO J.* **23**, 3844–3853.
